# Supplementary material for: Improving CO2/N2separation performance using nonionic surfactant Tween containing polymeric gel membranes
Source: Royal Society of Chemistry journal article supplement (doi:10.1039/c4ra14877k), 2014-12-10
Supplement: c4ra14877k1.pdf [file c4ra14877k1.pdf]

**Improving CO<sub>2</sub>/N<sub>2</sub> separation performance by nonionic surfactant  
Tween containing polymeric gel membranes**

Liang-liang Dong, Chun-fang Zhang, Yao-yao Zhang, Yun-xiang Bai\*, Jin Gu, Yiping Sun, Ming-qing Chen

## 1. Gas sorption method

(1) In order to eliminate gases present in the system and the sample, the system was evacuated by opening Valves 2 and 3 and closing Valve 1 for 3 h.

(2) Close Valves 2 and 3. Slowly open Valve 1 to make the gas progressively enter into the reference chamber until a required CO<sub>2</sub> pressure ( $P_1$ ) was achieved in the reference chamber, and then Valve 1 was closed.

(3) Slowly opening Valve 2 to allow CO<sub>2</sub> in the reference chamber to enter into the sample chamber to contact the sample. After a constant pressure ( $P_2$ ) was achieved, an equilibrium sorption was achieved. The quantity (mol) of CO<sub>2</sub> absorbed in the membrane can be calculated from

$$q_0 = \left[ (p_1 - p_2) V_R - p_2 (V_S - V_m) \right] / RT,$$

where  $V_m$  is the volume of the membrane sample, and  $R$  and  $T$  are gas constant and temperature, respectively.

(4) The reference chamber pressure was increased to  $P$  by repeating Step (2). Then, another equilibrium sorption at pressure  $P_e$  was achieved by repeating step (3). The accessorial sorption uptake of CO<sub>2</sub> can be calculated from

$$\Delta q = \left[ (p - p_e) V_R - (p - p_e) (V_S - V_m) \right] / RT.$$

Therefore, the overall quantity of CO<sub>2</sub> absorbed in the membrane at the pressure of  $P_e$  can be calculated from

$$q = \left[ (p - p_2 + p) V_R - p_e (V_R + V_S - V_m) \right] \frac{T_0}{TP_0 V_m}$$

This step was repeated to obtain the sorption uptakes of CO<sub>2</sub> at different pressures.

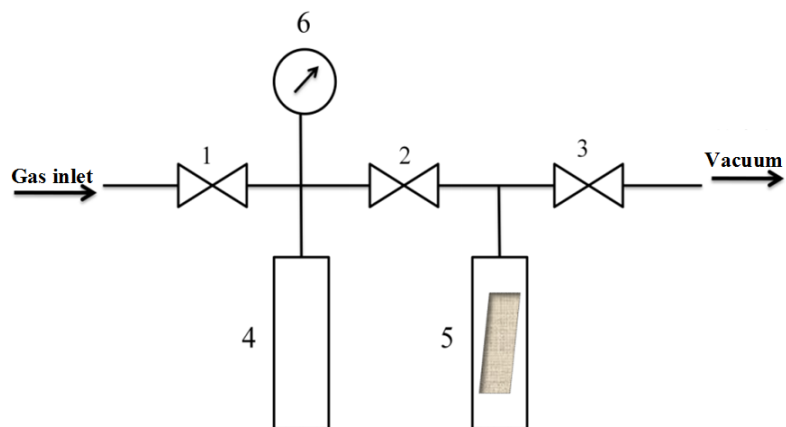

**Fig. S1** Schematic diagram of gas sorption setup: 1, 2, 3-needle valve; 4-reference volume; 5-sample volume; 6-digital vacuum-pressure gauge

## 2. Photographs of PEBA2533/Tween-50 membranes

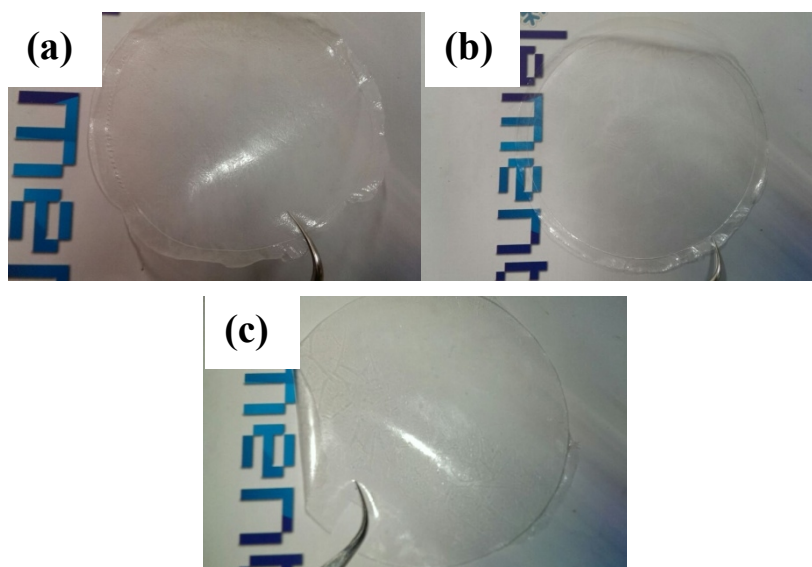

**Fig. S2** Photographs of PEBA2533/Tween-50 membranes (a) PEBA2533/Tween20-50 membrane; (b) PEBA2533/Tween21-50 membrane; (c) PEBA2533/Tween80-50 membrane

## 3. Thermal analysis of gel membranes

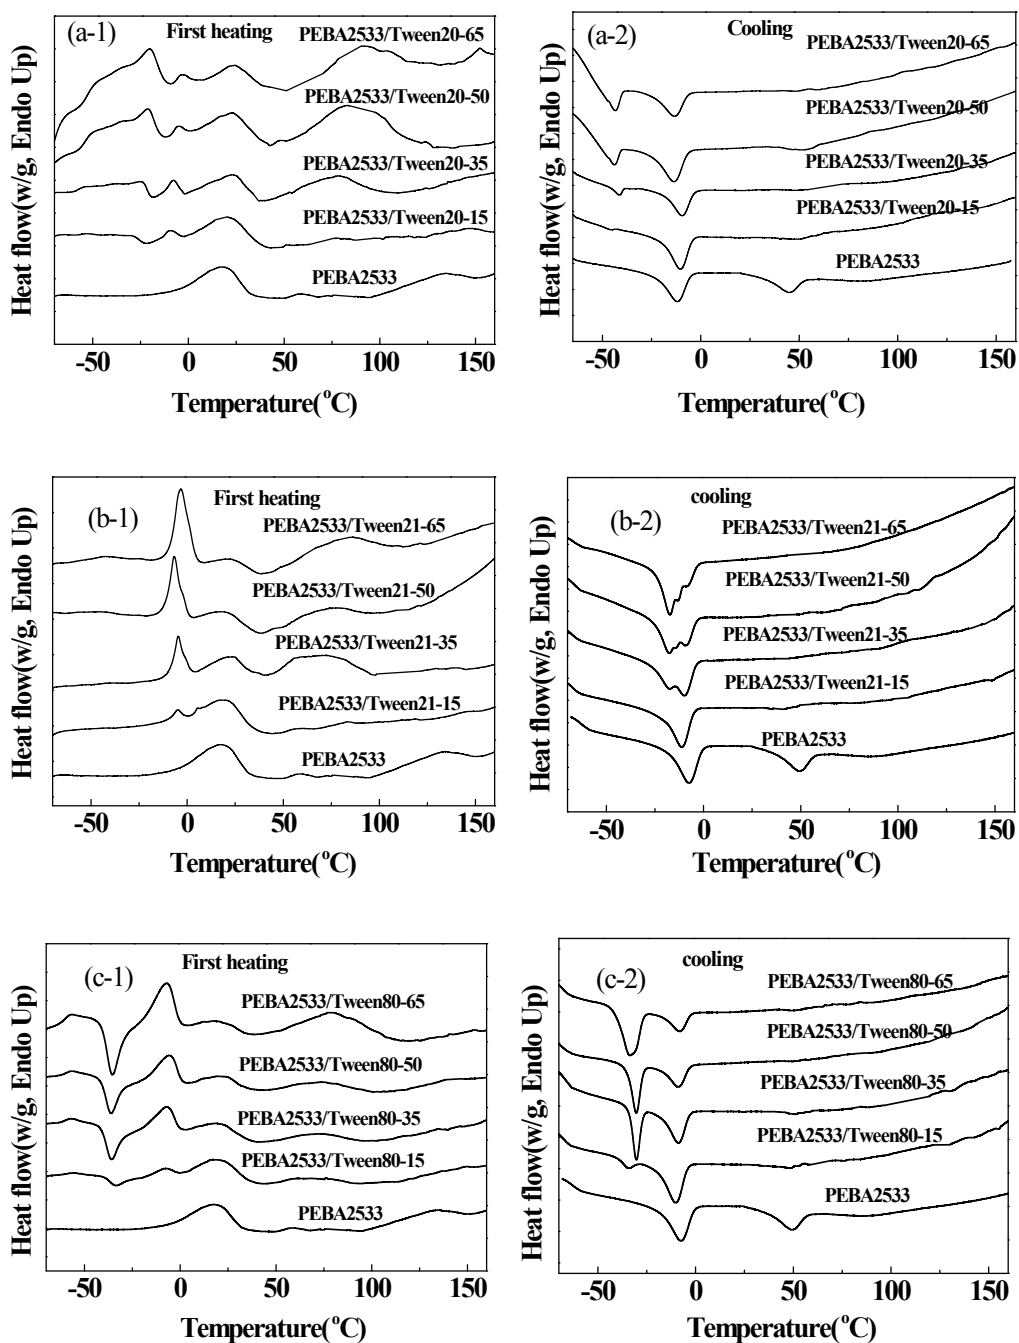

**Fig. S3** DSC thermograms of the PEBA2533 and PEBA2533/Tween membranes (a): PEBA2533 and PEBA2533/Tween20 membranes (b): PEBA2533 and PEBA2533/Tween21 membranes (c): PEBA2533 and PEBA2533/Tween80 membranes

The neat PEBA2533 is a microphase-separated thermoplastic elastomer and has two dominant endothermic peaks as seen by DSC. The low temperature melting point,  $T_m$  (PTMO), is ascribed to melting of crystals of the polyether blocks and occurs about 0~20 °C. The high temperature melting point,  $T_m$  (PA), is attributed to melting

of polyamide crystals and exists approximately 140~160 °C. During the first heating run for all PEBA2533/Tween gel membranes, there is a large peak appearing at about 80 °C and disappearing at the second heating run. This phenomenon is ascribed to the evaporation of humidity or residual solvent [1].

- [1] R. A. Zoppi and C. G. A. Soares, *Adv. Polym. Tech.*, 2002, **21**, 2-16.
